# Supplementary material
Source: MDPI journal article supplement (https://www.mdpi.com/2073-4344/9/4/386)
Supplement: s1 [file s1]

Article

# Supplementary Materials Point-defect-rich carbon sheets as the high-activity catalyst toward oxygen reduction and hydrogen evolution

Wenjing Yuan <sup>†</sup>, Fuhua Zhang <sup>†</sup>, Yaoyao Wu , Xiaotao Chen , Chihhsiang Fang and Chuanhao Li <sup>\*</sup>

Guangdong Provincial Key Laboratory of Environmental Pollution Control and Remediation Technology, School of Environmental Science and Engineering, Sun Yat-sen University, Guangzhou 510006, PR China; yuanwj7@mail.sysu.edu.cn; zhangfh5@mail2.sysu.edu.cn; wuyy69@mail2.sysu.edu.cn; chenxt68@mail2.sysu.edu.cn; fangch29@mail2.sysu.edu.cn

<sup>\*</sup> Correspondence: lichuanh3@mail.sysu.edu.cn

<sup>†</sup> These authors contributed equally to this work.

## 1. Formation mechanism of graphene-like mesoporous carbon sheets

The formation mechanism of graphene-like mesoporous carbon sheets are illustrated in Scheme 1. Calcium gluconate is encapsulated by ethanol, which is decomposed easily in situ production a lot of CO<sub>2</sub> via burning ethanol, and these CO<sub>2</sub>-bubbles play a key role for the formation of graphene-like mesoporous carbon sheets. At this point, calcium gluconate will change from solid state to molten state. A large number CO<sub>2</sub>-bubbles was formed at different locations in the interior of precursor, which build a series of channels by extrusion process from the interior to precursor-air interface. Where there are CO<sub>2</sub>-bubbles, there will be no carbon precursor. Therefore, the carbon precursor is only existed in the gaps of CO<sub>2</sub>-bubbles, resulting in the formation of graphene-like mesoporous carbon sheets.

## 2. Electron transfer number and H<sub>2</sub>O<sub>2</sub> yield

The electrocatalytic oxygen reduction reaction pathway of sample was evaluated by RRDE measurement. The electron transfer number (*n*) and H<sub>2</sub>O<sub>2</sub> yield can be calculated from the following the Eq. (1) and Eq. (2):

$$n = 4 \times \frac{I_D}{I_D + I_R / N} \quad (1)$$

$$H_2O_2(\%) = 200 \times \frac{I_R / N}{I_D + I_R / N} \quad (2)$$

Here, *I<sub>D</sub>*, *I<sub>R</sub>* and *N* are the disk current, ring current and collection efficiency of the Pt ring, respectively [1].

## 3. RHE Calibration

All potentials were converted to the reversible hydrogen electrode (RHE) scale based on the Nernst equation [2]:

$$E_{RHE} = E_{Ag/AgCl} + 0.2046 \text{ V} + 0.059 \text{ pH} \quad (3)$$

## 4. Tafel plot

Tafel slopes were calculated by fitting the linear portions of Tafel plots to the Tafel equation[3]:

$$\eta = b \log J + a \quad (4)$$

Where,  $\eta$ ,  $b$ ,  $J$  and  $a$  are the overpotential, Tafel slope, current density, and empirical coefficient.

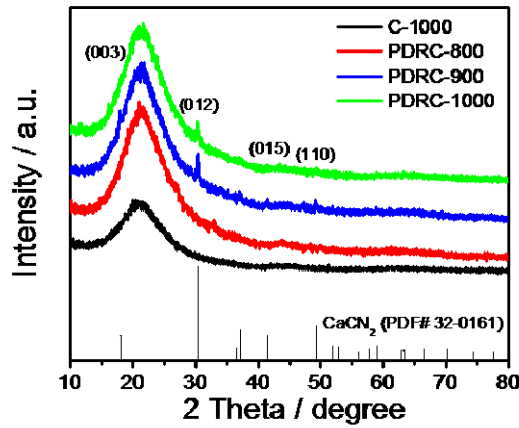

Figure S1. XRD patterns of C-1000, PDRC-800, PDRC-900 and PDRC-1000.

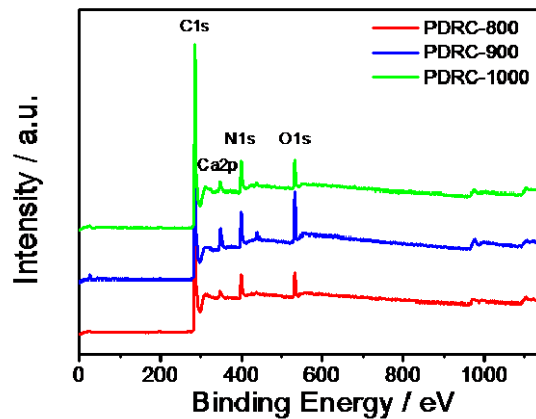

Figure S2. XPS data of PDRC-800, PDRC-900 and PDRC-1000.

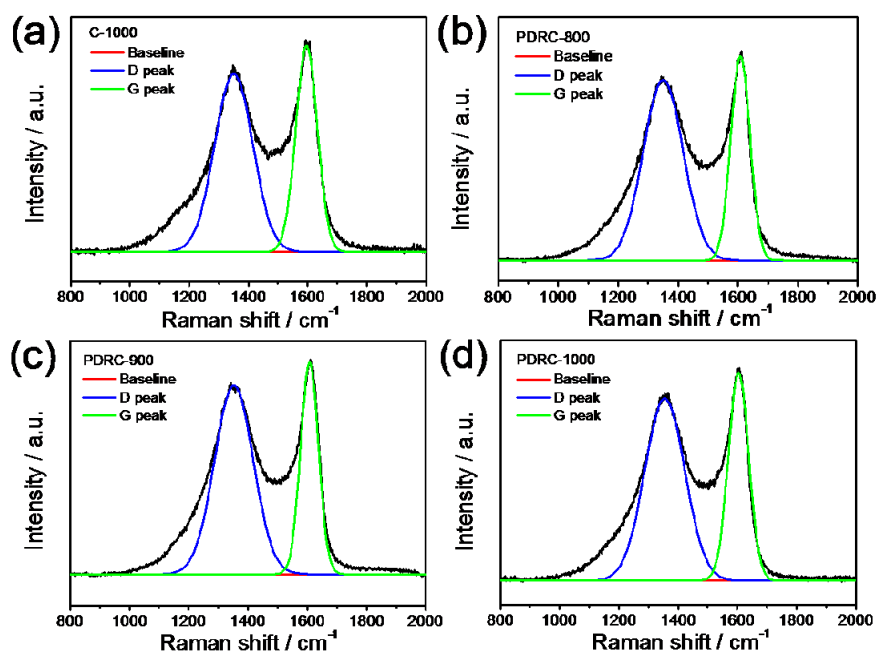

Figure S3. Raman spectra of (a) C-1000, (b) PDRC-800, (c) PDRC-900 and (d) PDRC-1000.

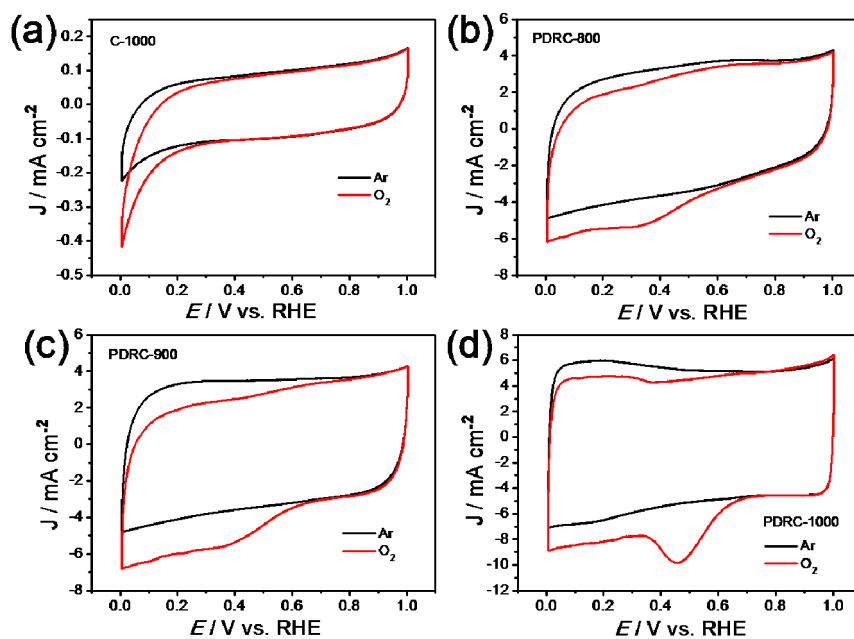

Figure S4. CV curves of (a) C-1000, (b) PDRC-800, (c) PDRC-900 and (d) PDRC-1000 (scan rate  $150 \text{ mV s}^{-1}$ ) in Ar- or  $\text{O}_2$ -saturated  $0.5 \text{ M H}_2\text{SO}_4$ .

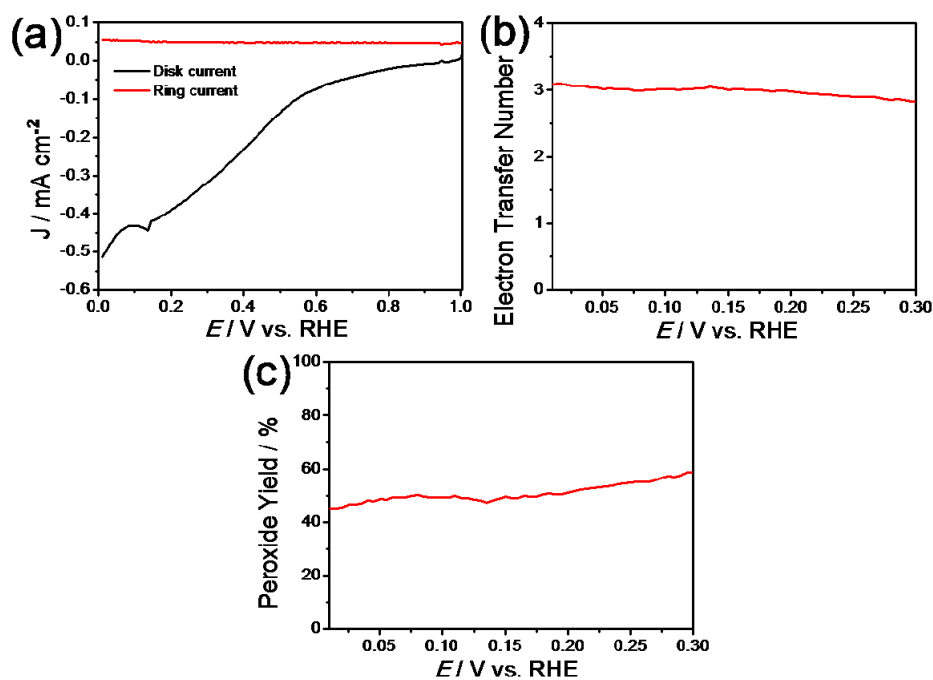

**Figure S5.** (a) RRDE voltammograms, (b) the  $n$  value and (c)  $\text{H}_2\text{O}_2$  yield of C-1000 in  $\text{O}_2$ -saturated 0.5 M  $\text{H}_2\text{SO}_4$ .

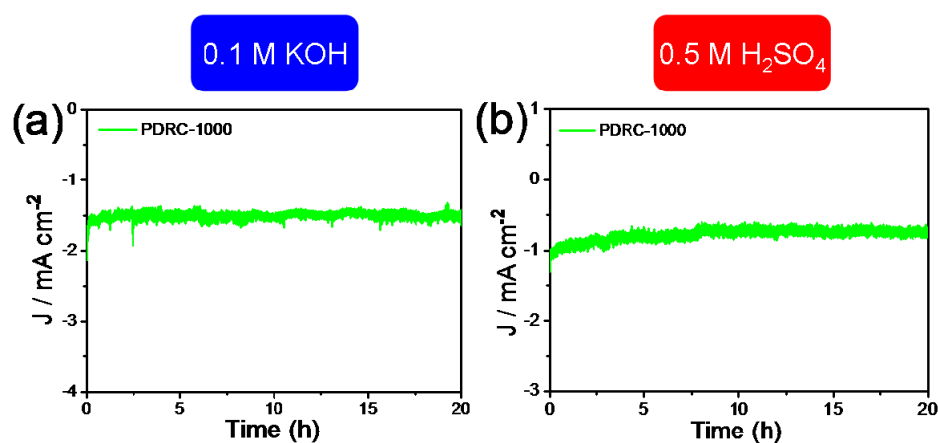

**Figure S6.** The stability measurements of PDRC-1000 electrode over 20 h in (a) alkaline and (b) acidic media, respectively.

**Table S1.** The atomic % of C, O, N and Ca of samples from XPS data.

| Samples   | C (at %) | O (at %) | N (at %) | Ca (at %) |
|-----------|----------|----------|----------|-----------|
| PDRC-800  | 79.59    | 9.6      | 10.11    | 0.7       |
| PDRC-900  | 68.04    | 14.42    | 13.12    | 4.42      |
| PDRC-1000 | 79.21    | 7.69     | 11.82    | 1.28      |

**Table S2.** The atomic % of the different N-bond types from XPS data.

| Samples | Pyridinic N (at %) | Pyrolic N (at %) | Graphitic N (at %) |
|---------|--------------------|------------------|--------------------|
|---------|--------------------|------------------|--------------------|

|           |      |      |      |
|-----------|------|------|------|
| PDRC-800  | 4.21 | 3.65 | 2.25 |
| PDRC-900  | 6.41 | 5.70 | 1.01 |
| PDRC-1000 | 5.49 | 4.68 | 1.65 |

**Table S3.** The summary table of the samples used and their main properties.

| Samples   | Treatment                 | BET surface area (m <sup>2</sup> g <sup>-1</sup> ) | Content of N (at %) |
|-----------|---------------------------|----------------------------------------------------|---------------------|
| C-1000    | Ar, 1000 °C               | 620                                                | 0                   |
| PDRC-800  | NH <sub>3</sub> , 800 °C  | 809                                                | 10.11               |
| PDRC-900  | NH <sub>3</sub> , 900 °C  | 1034                                               | 13.12               |
| PDRC-1000 | NH <sub>3</sub> , 1000 °C | 1158                                               | 11.82               |

## References

1. Yang, Y.; Lun, Z.; Xia, G.; Zheng, F.; He, M.; Chen, Q. Non-Precious Alloy Encapsulated in Nitrogen-Doped Graphene Layers Derived from MOFs as an Active and Durable Hydrogen Evolution Reaction Catalyst. *Energ. Environ. Sci* **2015**, *8*, 3563-3571.
2. Ferrero, G. A.; Preuss, K.; Fuertes, A. B.; Sevilla, M.; Titirici, M. M. The Influence of Pore Size Distribution on the Oxygen Reduction Reaction Performance in Nitrogen Doped Carbon Microspheres. *Journal of Materials Chemistry A* **2016**, *4*, 2581-2589.
3. Li, D. J.; Maiti, U. N.; Lim, J.; Choi, D. S.; Lee, W. J.; Oh, Y.; Lee, G. Y.; Kim, S. O. Molybdenum Sulfide/N-Doped CNT Forest Hybrid Catalysts for High-Performance Hydrogen Evolution Reaction. *Nano Letters* **2014**, *14*, 1228-1233.

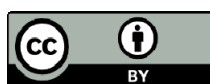

© 2019 by the authors. Submitted for possible open access publication under the terms and conditions of the Creative Commons Attribution (CC BY) license (<http://creativecommons.org/licenses/by/4.0/>).
